# Supplementary material for: Structurally dependent self-assembly and luminescence of polyoxometalate-cored supramolecular star polymers
Source: Royal Society of Chemistry journal article supplement (doi:10.1039/c3py01349a), 2013-11-19
Supplement: c3py01349a.pdf [file c3py01349a.pdf]

## Supporting information

### Structurally Dependent Self-assembly and Luminescence of Polyoxometalate-cored Supramolecular Star Polymers

Dan Li, Haolong Li,\* and Lixin Wu\*

State Key Laboratory of Supramolecular Structure and Materials, College of  
Chemistry, Jilin University, Changchun 130012, China.

\*Corresponding author. E-mail: [hl\\_li@jlu.edu.cn](mailto:hl_li@jlu.edu.cn); [wulx@jlu.edu.cn](mailto:wulx@jlu.edu.cn)

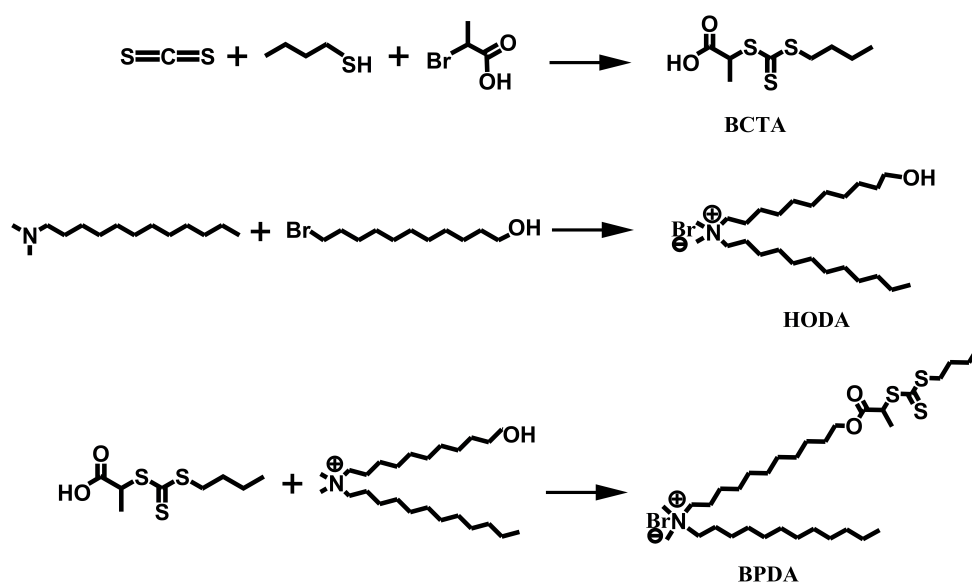

**Scheme S1.** Synthesis route of the bifunctional surfactant BPDA.

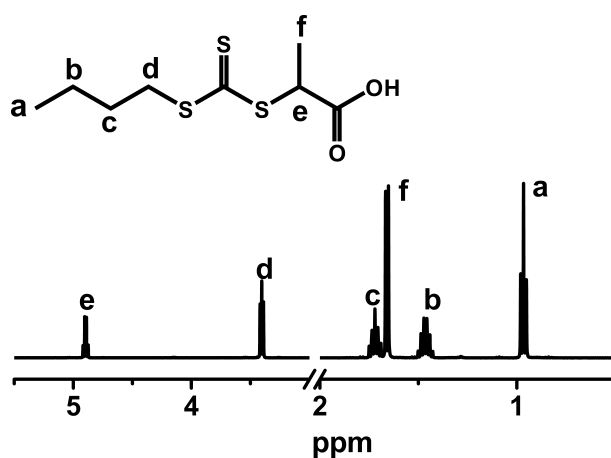

**Fig. S1**  $^1\text{H}$  NMR spectrum of BCTA.

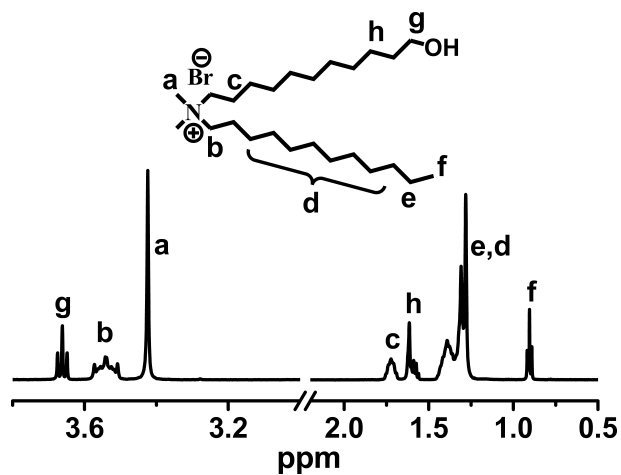

Fig. S2 <sup>1</sup>H NMR spectrum of HODA.

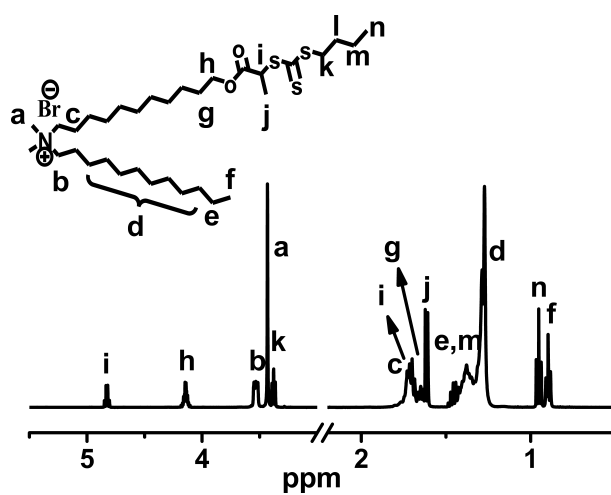

Fig. S3 <sup>1</sup>H NMR spectrum of BPDA.

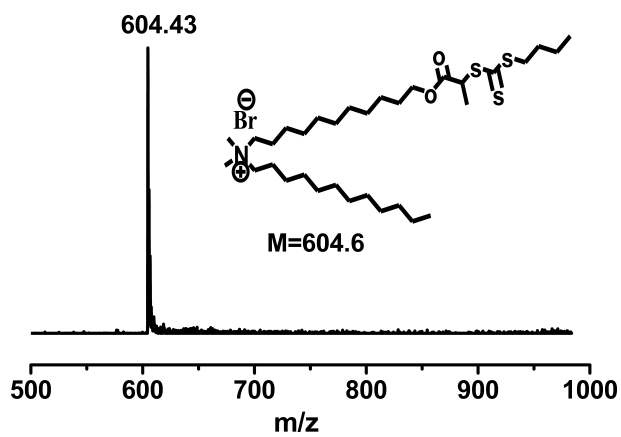

Fig. S4 MALDI-TOF result of the BPDA.

**Table S1.** Elemental analysis results of the four EuW<sub>10</sub>-cored SSP.

|                                                                                                                                                                                                                                      | C (%) | H (%) | N (%) |
|--------------------------------------------------------------------------------------------------------------------------------------------------------------------------------------------------------------------------------------|-------|-------|-------|
| Experimental results of BCTA                                                                                                                                                                                                         | 40.63 | 5.93  | -     |
| Calculated value of<br>(C <sub>8</sub> H <sub>14</sub> O <sub>2</sub> S <sub>3</sub> )Molecular weight: 238.0                                                                                                                        | 40.30 | 5.91  | -     |
| Experimental results of HODA                                                                                                                                                                                                         | 64.69 | 11.34 | 2.86  |
| Calculated value of<br>C <sub>25</sub> H <sub>54</sub> NOBr Molecular weight: 463.4                                                                                                                                                  | 64.62 | 11.71 | 3.01  |
| Experimental results of BPDA                                                                                                                                                                                                         | 56.82 | 9.42  | 2.01  |
| Calculated value of<br>C <sub>33</sub> H <sub>66</sub> NO <sub>2</sub> S <sub>3</sub> .H <sub>2</sub> O Molecular weight: 703.0                                                                                                      | 56.38 | 9.75  | 1.99  |
| Experimental results of SSP-12                                                                                                                                                                                                       | 69.43 | 7.07  | 0.89  |
| Calculated value of<br>(C <sub>33</sub> H <sub>66</sub> NO <sub>2</sub> S <sub>3</sub> ) <sub>9</sub> ((C <sub>8</sub> H <sub>8</sub> ) <sub>12</sub> ) <sub>7</sub> EuW <sub>10</sub> O <sub>36</sub><br>Molecular weight: 16760.6  | 69.44 | 7.61  | 0.75  |
| Experimental results of SSP-44                                                                                                                                                                                                       | 82.65 | 7.52  | 0.29  |
| Calculated value of<br>(C <sub>33</sub> H <sub>66</sub> NO <sub>2</sub> S <sub>3</sub> ) <sub>9</sub> ((C <sub>8</sub> H <sub>8</sub> ) <sub>44</sub> ) <sub>7</sub> EuW <sub>10</sub> O <sub>36</sub><br>Molecular weight: 40090.0  | 82.76 | 7.69  | 0.31  |
| Experimental results of SSP-71                                                                                                                                                                                                       | 85.94 | 7.52  | 0.25  |
| Calculated value of<br>(C <sub>33</sub> H <sub>66</sub> NO <sub>2</sub> S <sub>3</sub> ) <sub>9</sub> ((C <sub>8</sub> H <sub>8</sub> ) <sub>71</sub> ) <sub>7</sub> EuW <sub>10</sub> O <sub>36</sub><br>Molecular weight: 59774.2  | 85.86 | 7.70  | 0.21  |
| Experimental results of SSP-120                                                                                                                                                                                                      | 88.16 | 7.63  | 0.20  |
| Calculated value of<br>(C <sub>33</sub> H <sub>66</sub> NO <sub>2</sub> S <sub>3</sub> ) <sub>9</sub> ((C <sub>8</sub> H <sub>8</sub> ) <sub>120</sub> ) <sub>7</sub> EuW <sub>10</sub> O <sub>36</sub><br>Molecular weight: 95497.3 | 88.25 | 7.72  | 0.13  |

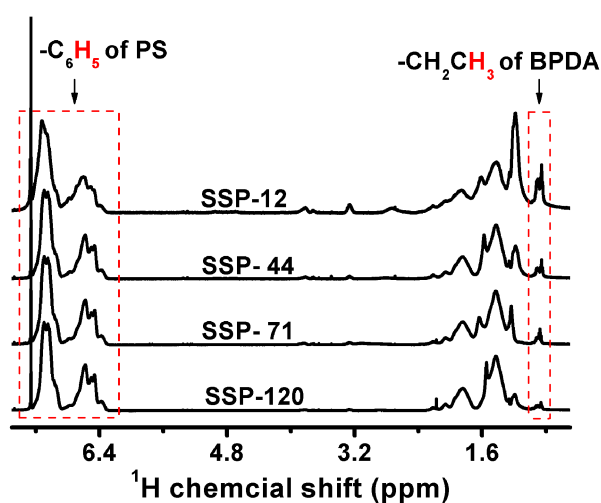

**Fig. S5** <sup>1</sup>H NMR spectra of the four EuW<sub>10</sub>-cored SSP in CDCl<sub>3</sub>.

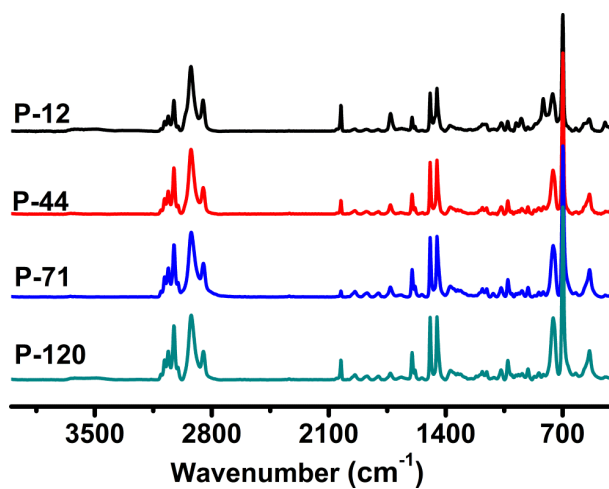

**Fig. S6** FTIR spectra of the four EuW<sub>10</sub>-cored SSP in KBr pellets.

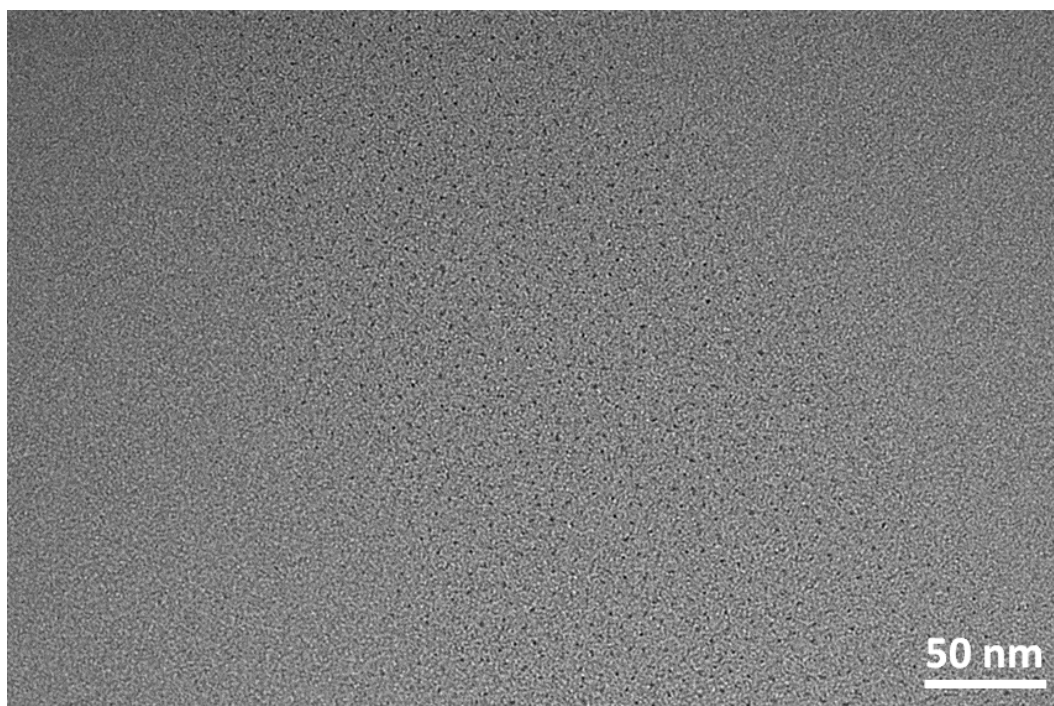

**Fig. S7** TEM image of SSP-12 before being stained by RuO<sub>4</sub>.

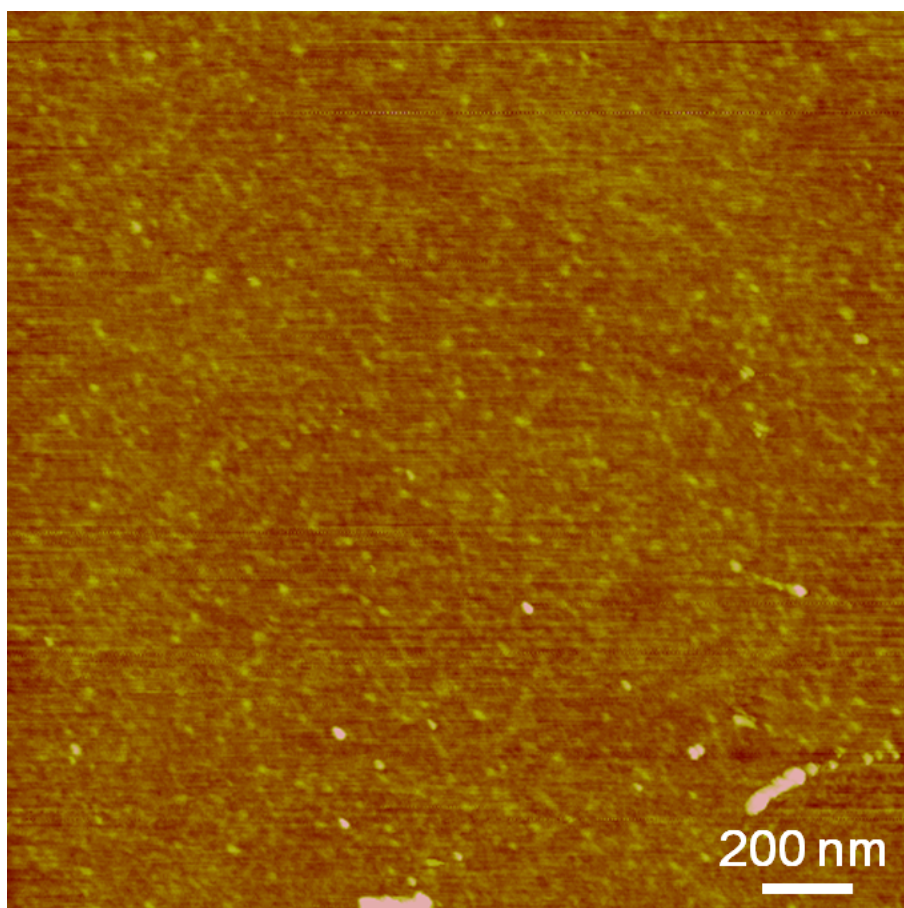

**Fig. S8** AFM image of SSP-120 on silica substrate.

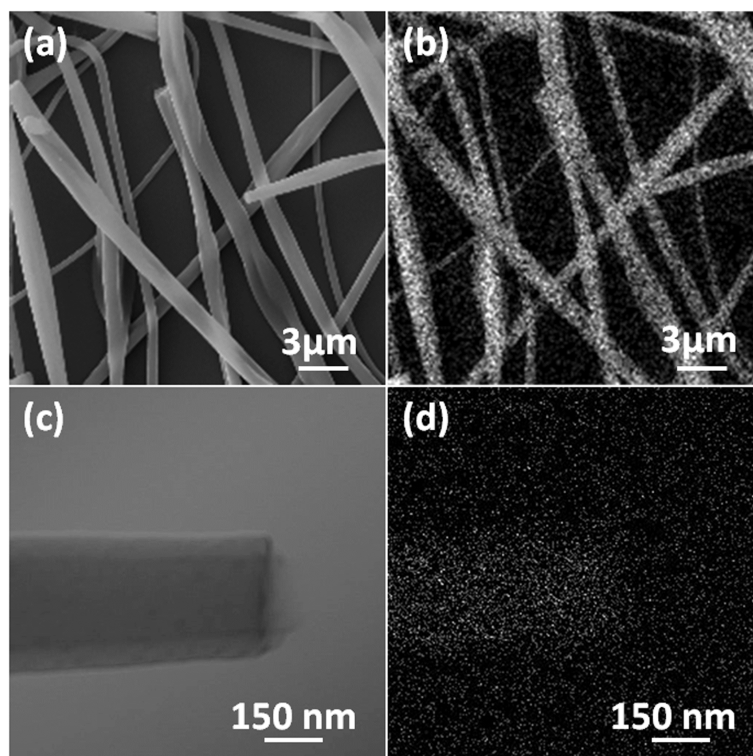

**Fig. S9** (a) SEM image of SSP-120 fibers prepared by electrospinning and (b) its

EDX mapping image by analyzing C element; (c) TEM image of a fiber and (d) its EDX mapping image by analyzing W element. Because the weight content of C and W in SSP-120 are 88.25% and 1.93% respectively, the EDX signal of W is relatively weak.

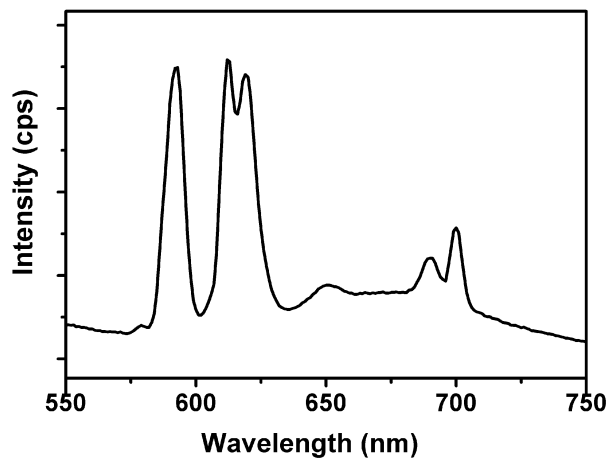

**Fig. S10** Emission spectrum of SSP-120 fiber prepared by electrospinning at an excitation wavelength of 275 nm.
